# Supplementary material for: Untargeted Metabolomics Combined with Solid Phase Fractionation for Systematic Characterization of Bioactive Compounds in Hemp with Methane Mitigation Potential
Source: MDPI journal article supplement (doi:10.3390/metabo12010077), 2022-01-13

Supplemented material

Kaempferol 7-sophoroside

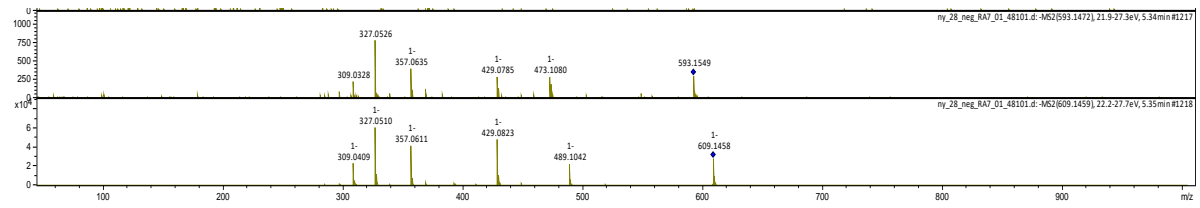

Kaempferol-3-O-neohesperidoside

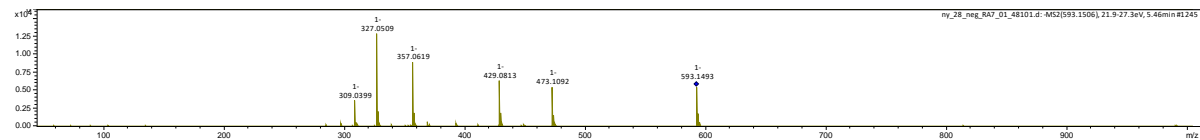

Orientin and Orientin + sugar moiety

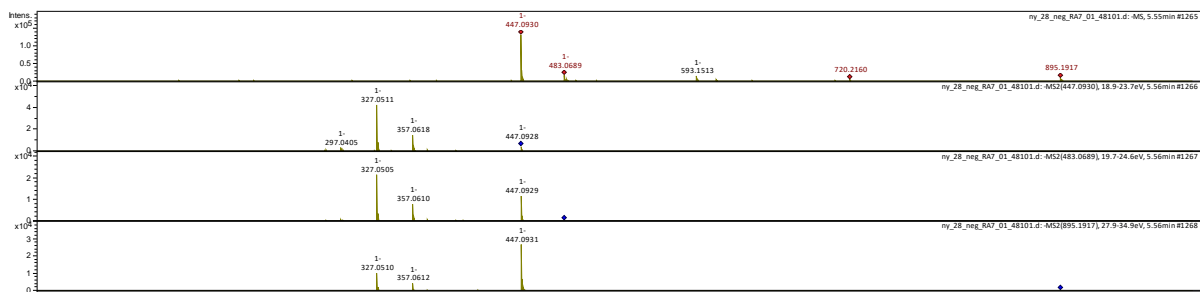

Kaempferol diglucoside and Kaempferol diglucoside + sugar moiety

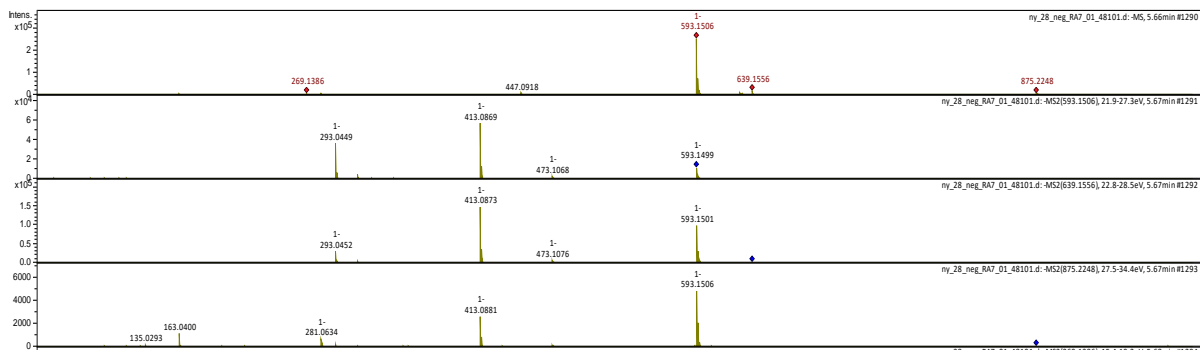

Daidzein diglucoside

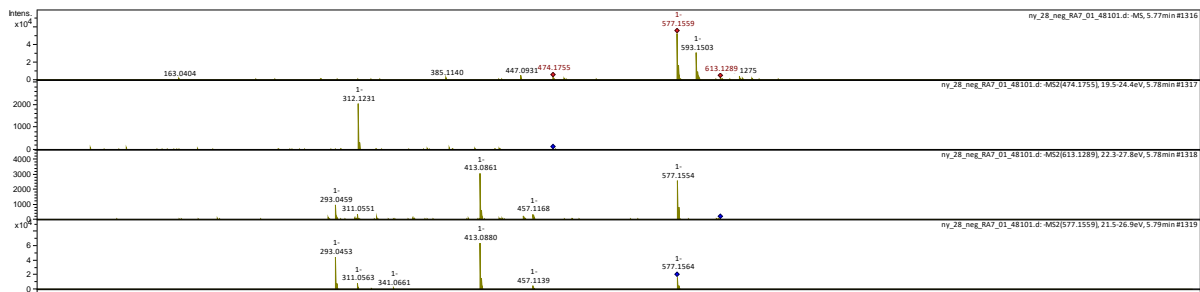

Vitexin and Vitiexin + sugar moiety

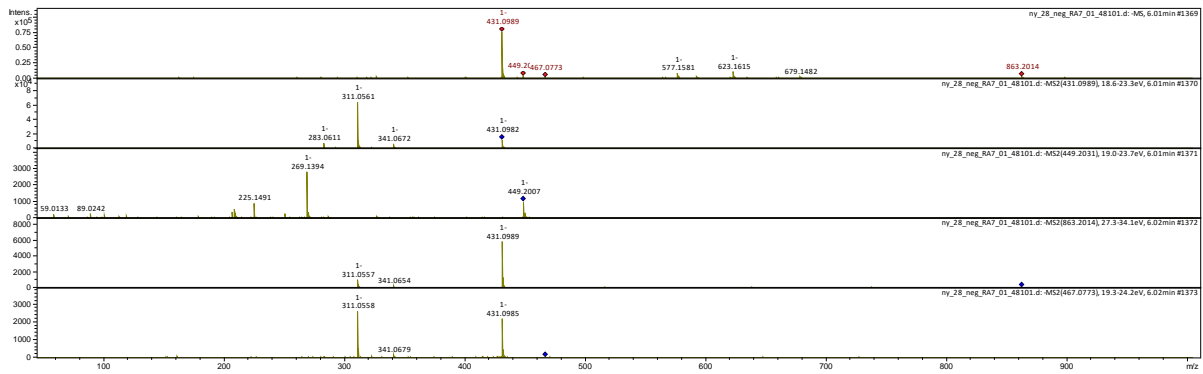

Kaempferol glucuronide and Kaempferol glucuronide + sugar moiety

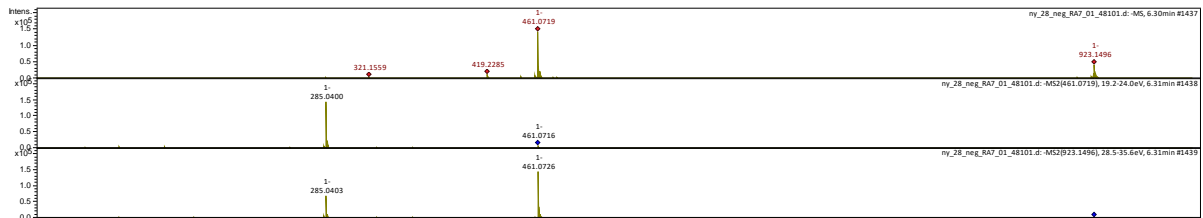

Genistein glucuronide and Genistein glucuronide + sugar moiety

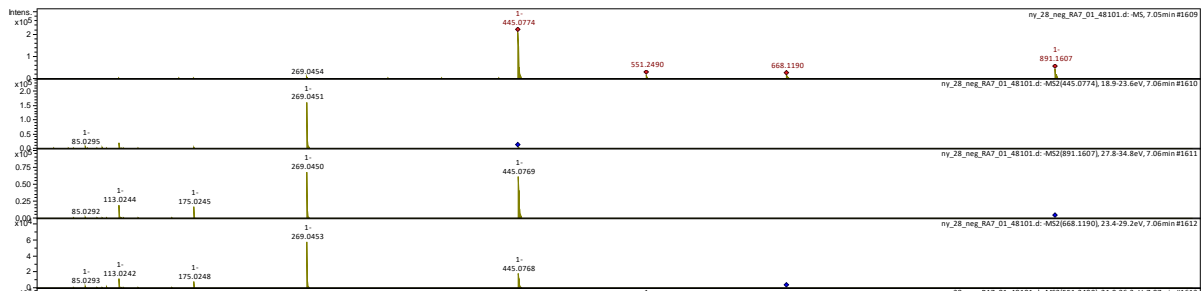

Diosmetin glucuronide and Diosmetin glucuronide + sugar moiety

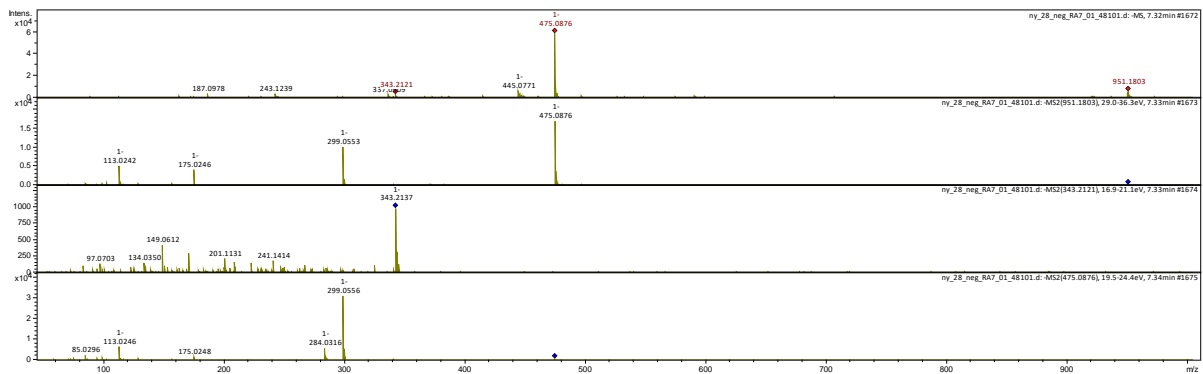

Supplement: s1 [file s1]
